# Supplementary material for: An evolutionarily conserved DNA architecture determines target specificity of the TWIST family bHLH transcription factors
Source: PubMed Central journal article supplement — Genes Dev. 2015 Mar 15;29(6):603–16. doi: 10.1101/gad.242842.114 (PMC4378193; doi:10.1101/gad.242842.114), 2015-03-15
Supplement: supp_gad.242842.114_SuppMaterial.pdf [file supp_gad.242842.114_SuppMaterial.pdf]

Figure S1

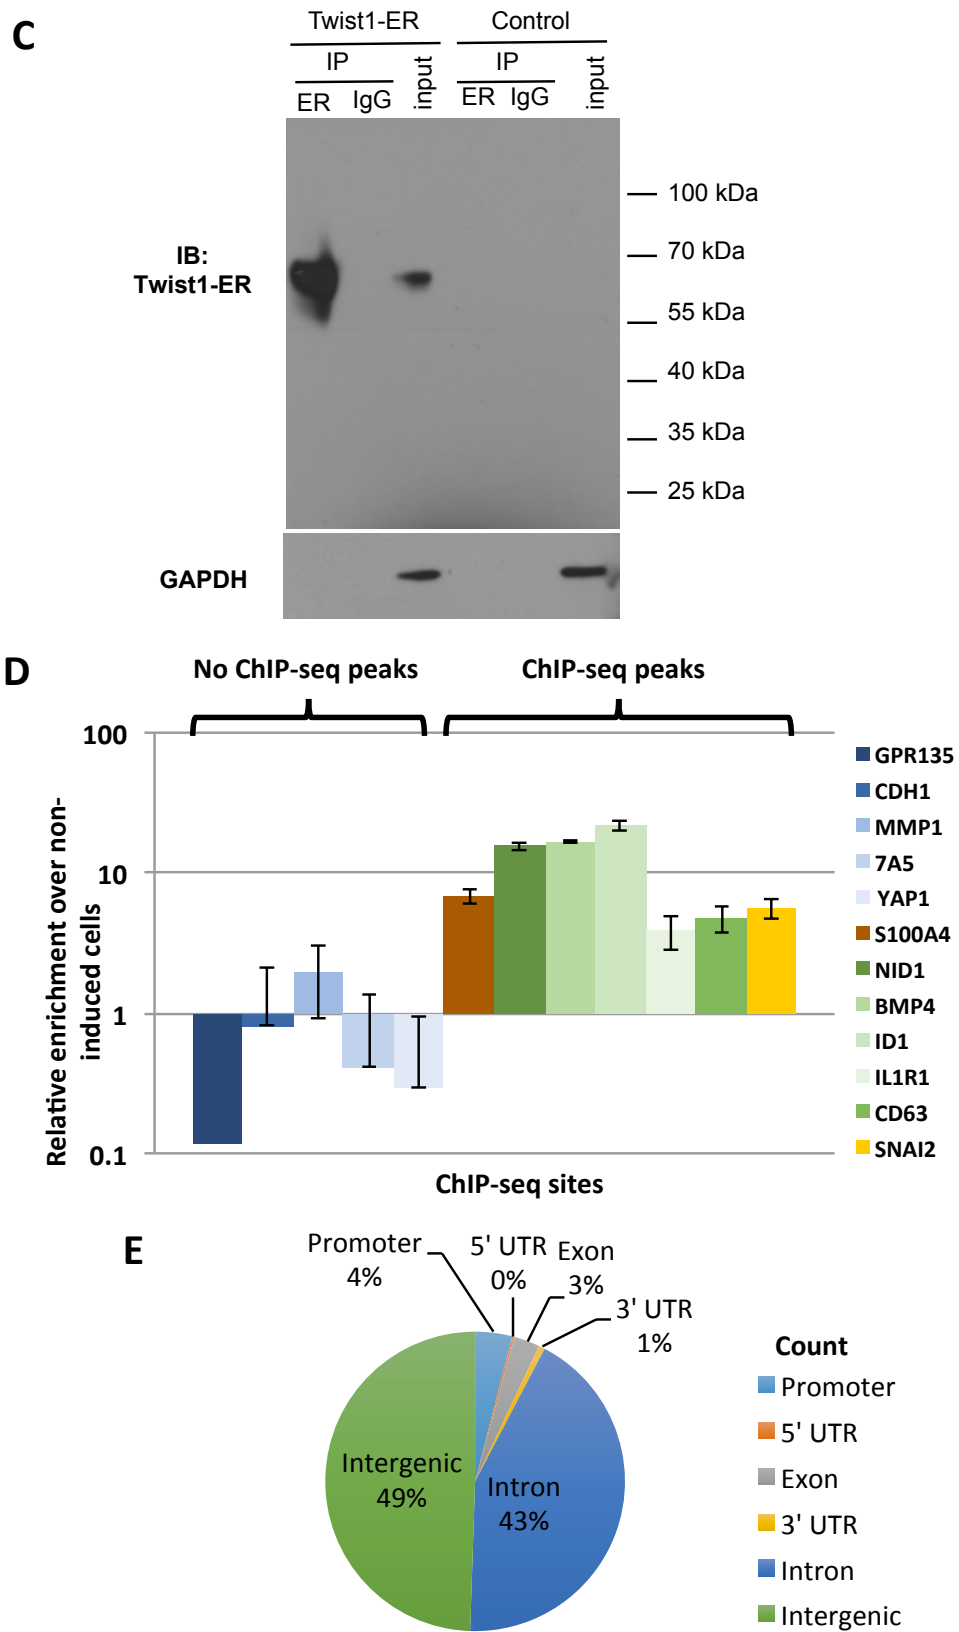

**Figure S1: Related to Figure 1.**

(A-B) A Twist1-binding site by ChIP-seq is mapped on the UCSC Genome Browser at the promoter regions of BMP4 (A) and A2M (B). A magnified view shows the double E-box sequence in the binding site highlighted with a red square. (C) HMLE-Twist1ER or HMLE-control cells were lysed and immunoprecipitated with the anti-ER antibody or control IgG and processed for western analysis for Twist1 and GAPDH. The data show that the ER antibody specifically recognizes and immunoprecipitate the Twist1-ER fusion protein from HMLE-Twist1ER cells. (D) HMLE-Twist1ER cells were treated with 4-OH Tamoxifen for four days to activate Twist1 and then processed for ChIP using an anti-ER antibody. Enriched Twist1-bound DNA fragments were used for qPCR analyses of randomly selected Twist1-binding peaks and non-bound regions identified by ChIP-seq. (E) Human Twist1-bound DNA fragments were categorized based on their locations in the human genome.

Figure S2

| Motif Name   | Consensus             | Species | P-value   | Log P-value | # of Target Sequences with Motif(of 13876) | % of Target Sequences with Motif | # of Background Sequences with Motif(of 31415) | % of Background Sequences with Motif | Fold enrichment above background |
|--------------|-----------------------|---------|-----------|-------------|--------------------------------------------|----------------------------------|------------------------------------------------|--------------------------------------|----------------------------------|
| Ebox-x2-Nx5  | CANNTGNNNNNCANNTG     | Human   | 1e-2097   | -4.83E+03   | 1994                                       | 14.37%                           | 166.5                                          | 0.53%                                | 27.11                            |
| Ebox-x2-Nx7  | CANNTGNNNNNNNCANNTG   | Human   | 1.00E-175 | -4.04E+02   | 389                                        | 2.80%                            | 138.4                                          | 0.44%                                | 6.36                             |
| Ebox-x2-Nx6  | CANNTGNNNNNNNCANNTG   | Human   | 1.00E-90  | -2.09E+02   | 382                                        | 2.75%                            | 252.8                                          | 0.80%                                | 3.44                             |
| Ebox-x2-Nx3  | CANNTGNNNCANNTG       | Human   | 1.00E-90  | -2.08E+02   | 348                                        | 2.51%                            | 214.9                                          | 0.68%                                | 3.69                             |
| Ebox-x2-Nx8  | CANNTGNNNNNNNNNCANNTG | Human   | 1.00E-82  | -1.90E+02   | 301                                        | 2.17%                            | 177.3                                          | 0.56%                                | 3.88                             |
| Ebox-x2-Nx2  | CANNTGNNNCANNTG       | Human   | 1.00E-72  | -1.66E+02   | 308                                        | 2.22%                            | 206.6                                          | 0.65%                                | 3.42                             |
| Ebox-x2-Nx1  | CANNTGNCANNTG         | Human   | 1.00E-45  | -1.05E+02   | 248                                        | 1.79%                            | 196.1                                          | 0.62%                                | 2.89                             |
| Ebox-x2-Nx9  | CANNTGNNNNNNNNNCANNTG | Human   | 1.00E-38  | -8.88E+01   | 214                                        | 1.54%                            | 172.8                                          | 0.54%                                | 2.85                             |
| Ebox-x2-Nx4  | CANNTGNNNCANNTG       | Human   | 1.00E-36  | -8.31E+01   | 251                                        | 1.81%                            | 230.2                                          | 0.73%                                | 2.48                             |
| Ebox-x2-Nx10 | CANNTGNNNNNNNNNCANNTG | Human   | 1.00E-16  | -3.86E+01   | 223                                        | 1.61%                            | 274.3                                          | 0.86%                                | 1.87                             |
| Ebox-x2-Nx0  | CANNTGCANNTG          | Human   | 1.00E-12  | -2.81E+01   | 188                                        | 1.35%                            | 244.4                                          | 0.77%                                | 1.75                             |
| Ebox-x2-Nx5  | CANNTGNNNNNCANNTG     | fly     | 1.00E-35  | -8.07E+01   | 52                                         | 5.65%                            | 188.2                                          | 0.52%                                | 10.87                            |
| Ebox-x2-Nx7  | CANNTGNNNNNNNCANNTG   | fly     | 1.00E-11  | -2.67E+01   | 25                                         | 2.71%                            | 162.8                                          | 0.45%                                | 6.02                             |
| Ebox-x2-Nx6  | CANNTGNNNNNNNCANNTG   | fly     | 1.00E-01  | -3.11E+00   | 14                                         | 1.52%                            | 326.5                                          | 0.91%                                | 1.67                             |
| Ebox-x2-Nx3  | CANNTGNNNCANNTG       | fly     | 1.00E-02  | -6.69E+00   | 19                                         | 2.06%                            | 333.2                                          | 0.92%                                | 2.24                             |
| Ebox-x2-Nx8  | CANNTGNNNNNNNNNCANNTG | fly     | 1.00E-07  | -1.69E+01   | 22                                         | 2.39%                            | 208.8                                          | 0.58%                                | 4.12                             |
| Ebox-x2-Nx2  | CANNTGNNNCANNTG       | fly     | 1.00E-04  | -1.14E+01   | 19                                         | 2.06%                            | 229.3                                          | 0.64%                                | 3.22                             |
| Ebox-x2-Nx1  | CANNTGNCANNTG         | fly     | 1.00E-02  | -5.34E+00   | 13                                         | 1.41%                            | 218.4                                          | 0.61%                                | 2.31                             |
| Ebox-x2-Nx9  | CANNTGNNNNNNNNNCANNTG | fly     | 1.00E-02  | -5.90E+00   | 14                                         | 1.52%                            | 228.4                                          | 0.63%                                | 2.41                             |
| Ebox-x2-Nx4  | CANNTGNNNCANNTG       | fly     | 1.00E-04  | -9.36E+00   | 14                                         | 1.52%                            | 159.4                                          | 0.44%                                | 3.45                             |
| Ebox-x2-Nx10 | CANNTGNNNNNNNNNCANNTG | fly     | 1.00E-05  | -1.33E+01   | 18                                         | 1.95%                            | 181.7                                          | 0.50%                                | 3.90                             |
| Ebox-x2-Nx0  | CANNTGCANNTG          | fly     | 1.00E-02  | -6.10E+00   | 23                                         | 2.50%                            | 460.2                                          | 1.28%                                | 1.95                             |

**Figure S2: Related to Figure 1 &2.**

Permutation analyses for the enrichment of the motifs containing two perfect E-boxes separated by 0-10 nucleotides among human and Drosophila Twist-binding peaks. The results show that two E-boxes separated by 5nt spacing are more common than any other spacing configurations for both human and Drosophila binding.

**Figure S3**

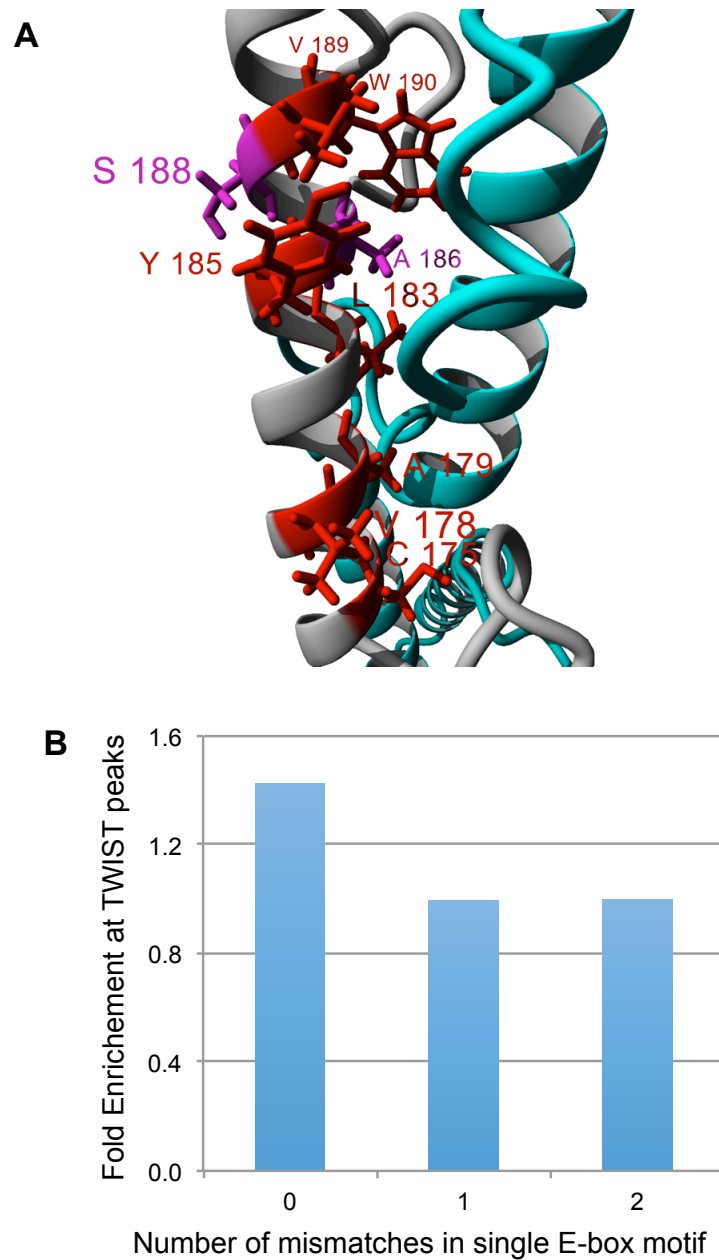

**Figure S3: related to Figure 3.**

A) A high-resolution view of the interacting face between the two WR domains of the human Twist1 protein. B) Computational analysis of the single E-box motif at human Twist1-binding peaks shows that the CANNTG sequence with 1 or 2 mismatched nucleotide are not enriched above the calculated random occurrence frequency of each motif.

Figure S4

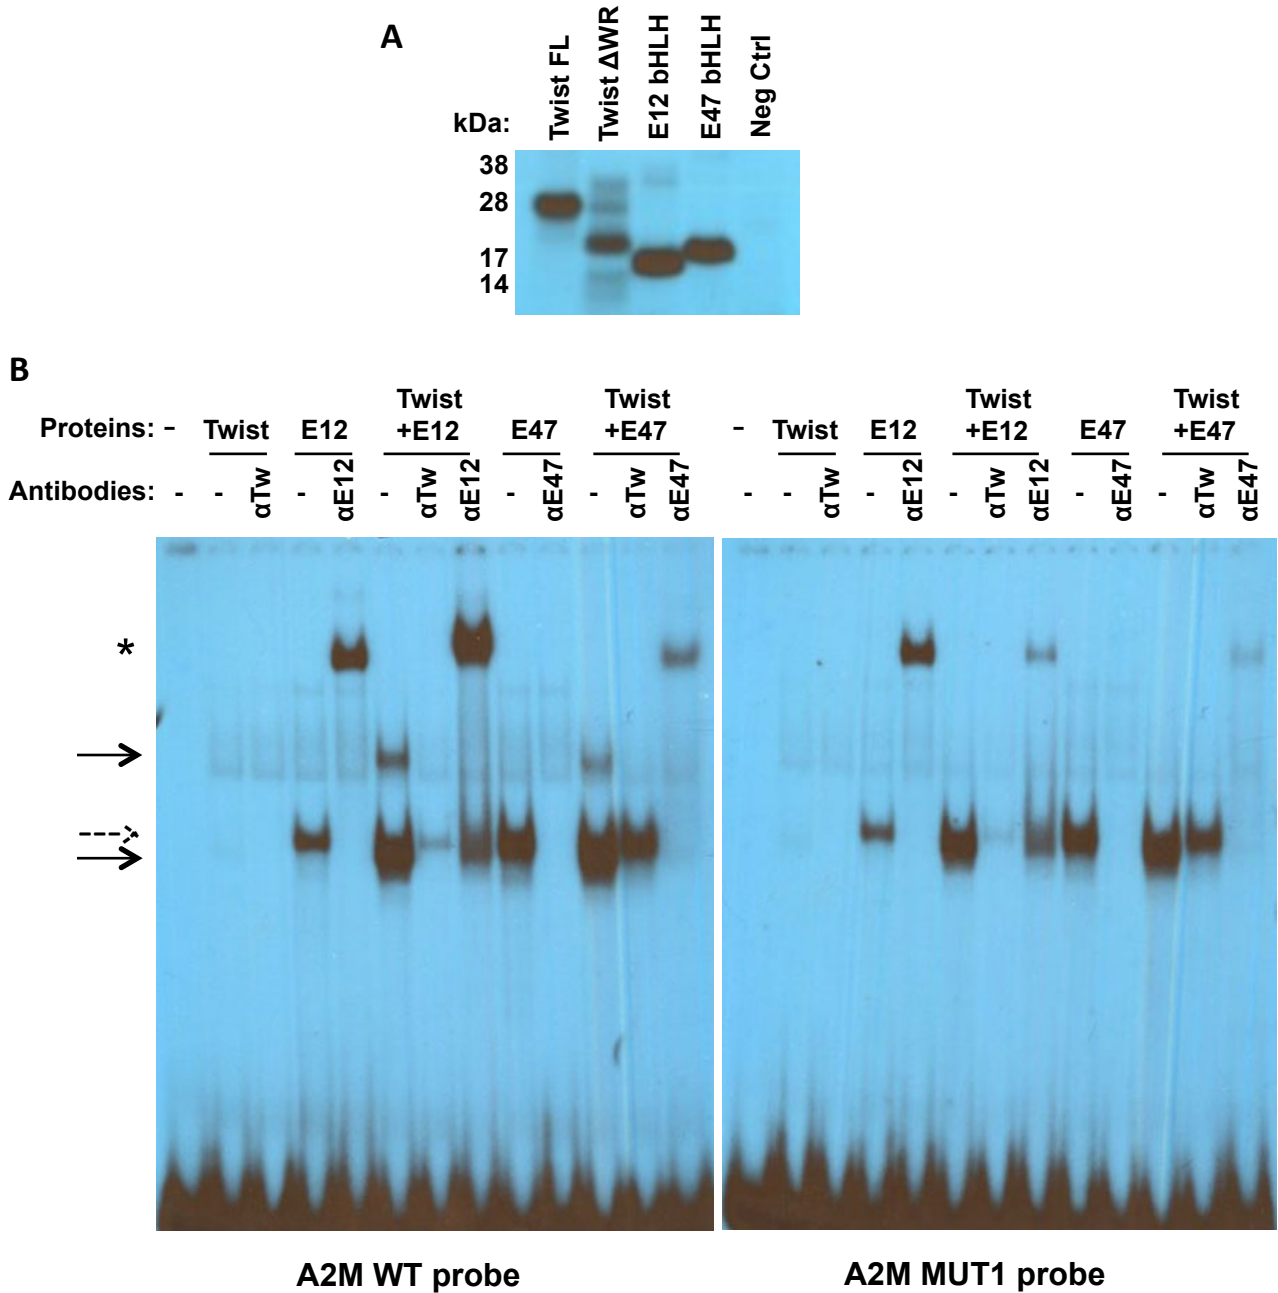

Figure S4: related to Figure 4 and 6.

(A) In vitro translated S<sup>35</sup>-labeled Twist1 full-length, Twist1 $\Delta$ WR, E12bHLH and E47bHLH proteins were visualized by SDS-PAGE and used to normalize the amount of proteins used in individual EMSA assays. (B) EMSA analysis of human Twist1/E12 or Twist1/E47 bound to a 30nt oligo containing the Double E-box motif from the human *A2M* promoter or the same oligo



with one of the E-boxes mutated. Antibodies against Twist1, E12, or E47 were added into the corresponding reactions to either supershift (for E12) or block (for Twist1 and E47) the protein/DNA complexes. These are the replicate experiments shown in Fig. 4E and 4F, and these gels were run for a shorter period of time to show equal amounts of excess free probes.

Figure S5

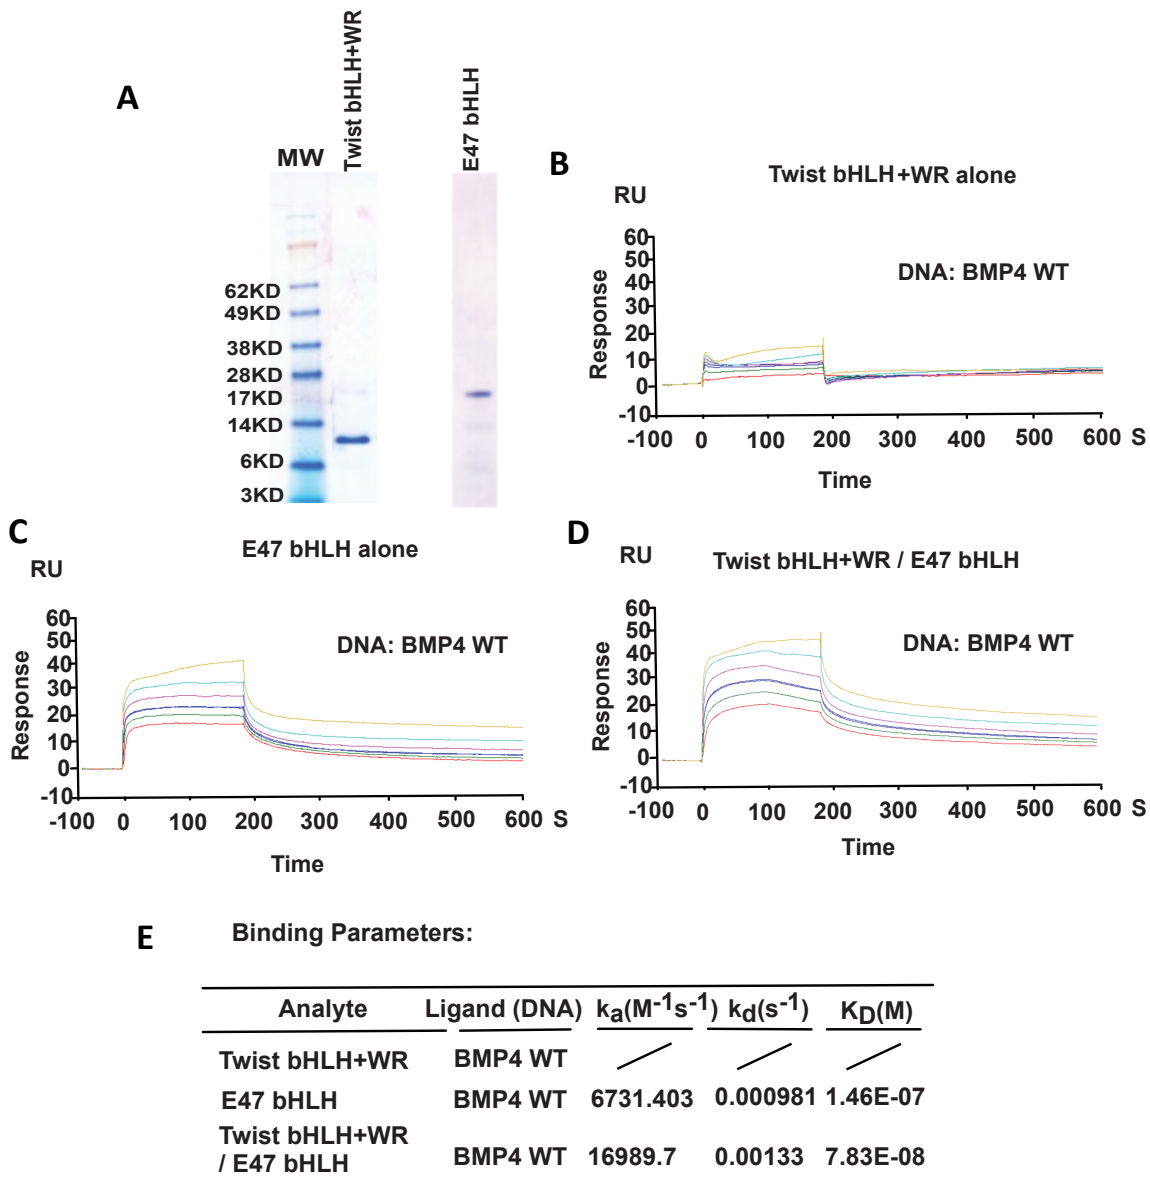

Figure S5: related to Figure 5.

(A) Purified His-tagged Twist1 bHLH+WR and E47 proteins were expressed in E.coli by using codon optimization strategies to the fully synthetic hTwist1 coding sequence and inserted into the pQE30 vector. (B-D) SPR-based kinetic analysis of the association and dissociation rates between the double E-box motif with 5nt spacing and Twist1 bHLH+WR (A), E47 bHLH (B),

and Twist1 bHLH+WR and E47 bHLH together (C). (D) Summary of the binding parameters obtained by the SRP-based kinetic analysis shown in (B-D).

Figure S6

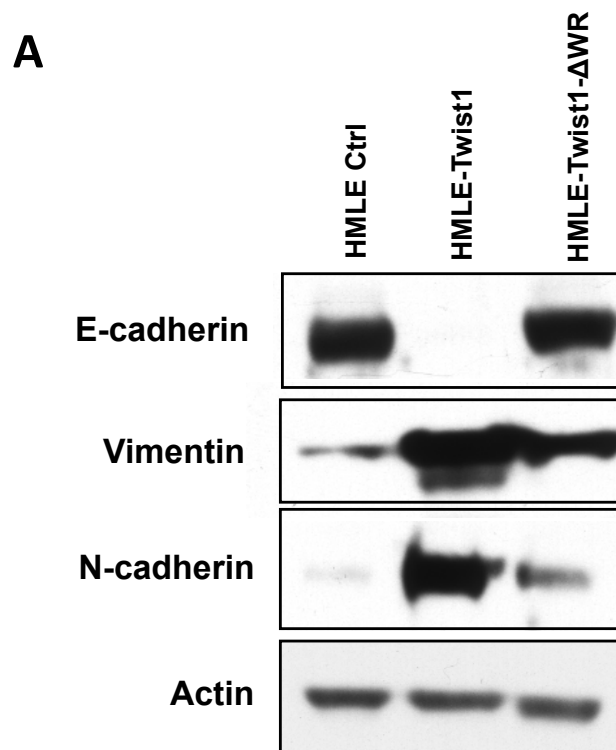

**B**

| Gene Name | Distance from TSS(Double E-box Sequence)                  |
|-----------|-----------------------------------------------------------|
| BMP4      | 238(CTCACCTGGGGACCACGTGC)                                 |
| SYT12     | 403(CACACTTGCTCCCATCTGG)                                  |
| LAMB1     | 924(GCCACATGGCCCCATCTGT)                                  |
| FILIP1L   | 28(TGCCTGTGCCAGCAGCTGC)                                   |
| CSF2      | 4268(GTCATCTGGTGCCCTGCTGT)                                |
| NTSR1     | 5464(ACCATGTGGACAGCAGGCGG),<br>5296(GCCAGGTGGAAGGCAGATGG) |
| A2M       | 2502(ATCAGATGGAAGCCATGTGT)                                |
| SERPINF1  | 2413(GCCGGGTGGAGACCAGCTGT)                                |

**Figure S6: related to Figure 6.**

(A) HMLE control cells and HMLE cells expressing Twist1 and Twist1 $\Delta$ WR were processed for Western blot analyses for expression of epithelial marker; E-cadherin, and mesenchymal markers; vimentin and N-cadherin. (B) A list of positions of individual double E-box motif sites relative to Transcription Start Site (TSS) for individual genes tested in Figure 7C.

**SUPPLEMENTAL EXPERIMENTAL PROCEDURES: related to Experimental Procedures.**

Primers used for qPCR analysis of Twist1 target genes used in Fig. 7C.

| Gene Name        | Primer Sequence          |
|------------------|--------------------------|
| BMP4 Forward     | CCGCAGCCTAGCAAGAGTG      |
| BMP4 Reverse     | GCTCAGGATACTCAAGACCAGTG  |
| SYT12 Forward    | CAGAATACCATCTGAGCGTCATC  |
| SYT12 Reverse    | TAGTCGTAATTGGGGAACGGA    |
| LAMB1 Forward    | CACAAGCCCGAACCCTACTG     |
| LAMB1 Reverse    | GACCACATTTTCAATGAGATGGC  |
| FILIP1L Forward  | ACAGCTCACCTTCAAAGACA     |
| FILIP1L Reverse  | TCCTTCTCTAGTCTGGTTGCC    |
| CSF2 Forward     | TCCTGAACCTGAGTAGAGACAC   |
| CSF2 Reverse     | TGCTGCTTGTAGTGGCTGG      |
| SERPINF1 Forward | GGAAATCCCGATGAGATCAGC    |
| SERPINF1 Reverse | AGTCAAACCTTTGTTACCCACTGC |
| NTSR1 Forward    | AGCAGTGGACTCCGTTCT       |
| NTSR1 Reverse    | GTTGGCAGAGACGAGGTTGT     |
| A2M Forward      | AGGAAATCGCATCGCACAATG    |
| A2M Reverse      | ACGGTGAAAGGGTGCTCTG      |
| GAPDH Forward    | GACCCCTTCATTGACCTCAAC    |
| GAPDH Reverse    | CTTCTCCATGGTGGTGAAGA     |
